# Supplementary material for: Ni-catalyzed regioselective C–C bond formation of 1,1-disubstituted allenes with aldehydes
Source: Royal Society of Chemistry journal article supplement (doi:10.1039/d3qo01800h), 2023-12-11
Supplement: d3qo01800h1.pdf [file d3qo01800h1.pdf]

# **Ni-Catalyzed Regioselective C-C Bond Formation of 1,1-Disubstituted Allenes with Aldehydes**

Seoyeon Kim, Jinyoung Kim, Shrikant D. Tambe, and Eun Jin Cho\*

Department of Chemistry, Chung-Ang University, 84 Heukseok-ro, Dongjak-gu, Seoul 06974,

Republic of Korea

E-mail: [ejcho@cau.ac.kr](mailto:ejcho@cau.ac.kr) (E. J. Cho)

## **Supporting Information**

|                                                                                    |     |
|------------------------------------------------------------------------------------|-----|
| <b>General Considerations</b>                                                      | S1  |
| <b>Experimental Details</b>                                                        | S3  |
| <b>Additional Experiments</b>                                                      | S5  |
| <b>Analytic Data for Synthesized Compounds</b>                                     | S9  |
| <b>References</b>                                                                  | S18 |
| <b>NMR Spectra (<sup>1</sup>H NMR, <sup>13</sup>C NMR, and <sup>19</sup>F NMR)</b> | S19 |

## General Considerations

### General Reagent Information

All commercially available reagents were purchased from Sigma-Aldrich, Alfa Aesar, Combi blocks or TCI companies and used without further purification. Flash column chromatography was performed using ZEOCHEM ZEOprep silica gel 60 (60-200 mesh).

### General Analytical Information

The synthesized homoallylic alcohol **3** were characterized by  $^1\text{H}$ ,  $^{13}\text{C}\{^1\text{H}\}$ , and  $^{19}\text{F}\{^1\text{H}\}$  NMR, and FT-IR spectroscopy. NMR spectra were recorded on a Varian 600 MHz instrument (600 MHz for  $^1\text{H}$  NMR, 151 MHz for  $^{13}\text{C}\{^1\text{H}\}$  NMR, and 564 MHz for  $^{19}\text{F}\{^1\text{H}\}$  NMR). Copies of  $^1\text{H}$  NMR,  $^{13}\text{C}\{^1\text{H}\}$  NMR and  $^{19}\text{F}\{^1\text{H}\}$  NMR spectra can be found in this Supporting Information.  $^1\text{H}$  NMR experiments are reported in units, parts per million (ppm), and were measured relative to residual  $\text{CDCl}_3$  (7.26 ppm) or  $\text{CD}_3\text{CN}$  (1.94 ppm) in the deuterated solvent.  $^{13}\text{C}$  NMR spectra are reported in ppm relative to  $\text{CDCl}_3$  (77.23 ppm) or  $\text{CD}_3\text{CN}$  (1.32 ppm), and all were obtained with  $^1\text{H}$  decoupling.  $^{19}\text{F}$  NMR spectra are reported in ppm, and all were taken composite pulse decoupling (CPD) mode. Coupling constants were reported in Hz. Reactions were monitored by GC-MS using the Agilent GC 7890B/5977A inert MSD with Triple-Axis Detector. Mass spectral data of all unknown compounds were obtained from the Korea Basic Science Institute (Daegu) on a Jeol JMS 700 high resolution mass spectrometer. Chiral HPLC analysis was performed on waters e2695 separations module instrument.

## Photon Source



All photon sources and accessories were purchased from HepatoChem company. A PhotoRedOx Box<sup>®</sup> with P205-18-2 450 nm 18 W blue LEDs (34 mW/cm<sup>2</sup>) was used for the reactions. All reaction tubes have the same light intensity by using the PhotoRedOx Box<sup>®</sup> equipped with mirrors.



**Figure S1. Light spectra of the photon source: P205-18-2 18 W blue LED ( $\lambda_{\text{max}}$  450 nm).**

## Experimental Details

### General procedure for synthesis of 1,1-diarylsubstituted allenes (**1a – 1d**)<sup>[S1],[S2]</sup>



Step 1: In an oven dried flask, was added methyl triphenylphosphonium bromide (1.2 eq) followed by THF (25 mL). Then *t*BuOK (1.2 eq) was added, and the resulting yellow suspension was stirred at room temperature. After 1 h, diaryl ketone (5 mmol) was added in one portion and the resulting mixture was further stirred at room temperature and the reaction progress was monitored by thin-layer chromatography. Upon completion after 16 h, the reaction was quenched with water, and the aqueous phase was extracted with diethyl ether (2 × 30 mL). The resulting organic phase was dried over MgSO<sub>4</sub>, filtered, and concentrated in *vacuo*. The residue was purified by silica gel flash column chromatography using (hexanes) to give the corresponding alkene derivative **S1**.

Step 2: To a solution of alkene **S1** (4 mmol), bromoform (1.5 eq) and BnNEt<sub>3</sub>Cl (2 mol%) was added dropwise a solution of 50% NaOH (1 g NaOH dissolved in 2 mL water), and the mixture was stirred at room temperature for 1 h, then heated to 60 °C and the reaction progress was monitored by thin-layer chromatography. Upon completion (~15 h), the reaction was quenched with water and the aqueous phase was extracted with DCM (2 × 25 mL). The combined organic phase was washed with brine (30 mL). The resulting organic phase was dried over MgSO<sub>4</sub>, filtered, and concentrated in *vacuo*. The residue was purified by silica gel flash column chromatography using (hexanes/ethyl acetate, 99/1) to give the corresponding dibromo derivative **S2**.

Step 3: EtMgBr (1.0 M in THF, 1.5 eq) was added dropwise to a pre-cooled ice-bath solution of **S2** (2 mmol) in dry THF (4 mL) under argon atmosphere. After EtMgBr was added, the mixture was then slowly warmed to room temperature, and stirred at room temperature for an additional 2 h. Then the reaction was quenched by NH<sub>4</sub>Cl solution, water was added, and the mixture extracted with diethyl ether (2 × 25 mL). The combined organic phase was washed with brine, dried over MgSO<sub>4</sub>, and filtered. After removing the solvent under reduced pressure, the residue was purified by silica gel flash column chromatography using (hexanes) to afford the corresponding allene (**1a – 1d**).

### General procedure for synthesis of 1,1-dialkylsubstituted allenes (**1e – 1h**)<sup>[S3]</sup>



## Additional Experiments

**Table S1. Optimization table<sup>a,b</sup>**



| Entries  | Solvent                 | Ni catalyst                                        | PC                                            | H source                | Variations                             | Yield of 3aa | Yield of 4aa |
|----------|-------------------------|----------------------------------------------------|-----------------------------------------------|-------------------------|----------------------------------------|--------------|--------------|
| 1        | TFE                     | NiCl <sub>2</sub> (DME)                            | [Ir(dtbbpy)(ppy) <sub>2</sub> PF <sub>6</sub> | Hantzsch ester          | -                                      | 0            | 0            |
| 2        | THF                     | NiCl <sub>2</sub> (DME)                            | [Ir(dtbbpy)(ppy) <sub>2</sub> PF <sub>6</sub> | Hantzsch ester          | -                                      | 14           | 5            |
| 3        | hexane                  | NiCl <sub>2</sub> (DME)                            | [Ir(dtbbpy)(ppy) <sub>2</sub> PF <sub>6</sub> | Hantzsch ester          | -                                      | 0            | 0            |
| 4        | HMPA/DMSO (1/1)         | Ni(acac) <sub>2</sub>                              | [Ir(dtbbpy)(ppy) <sub>2</sub> PF <sub>6</sub> | Hantzsch ester          | -                                      | 26           | 0            |
| 5        | HMPA/DMSO (1/1)         | Ni(PPh <sub>3</sub> ) <sub>2</sub> Cl <sub>2</sub> | [Ir(dtbbpy)(ppy) <sub>2</sub> PF <sub>6</sub> | Hantzsch ester          | -                                      | 38           | 3            |
| <b>6</b> | <b>HMPA/DMSO (1/1)</b>  | <b>Ni(NTf<sub>2</sub>)<sub>2</sub></b>             | <b>4-CzIPN</b>                                | <b>Hantzsch ester</b>   |                                        | <b>56</b>    | <b>0</b>     |
| 7        | HMPA/DMSO (1/1)         | Ni(NTf <sub>2</sub> ) <sub>2</sub>                 | 4-CzIPN                                       | Hantzsch ester (1.5 eq) | -                                      | 47           | 0            |
| 8        | HMPA/DMSO (1/1)         | Ni(NTf <sub>2</sub> ) <sub>2</sub>                 | 4-CzIPN                                       | Hantzsch ester (2.5 eq) | -                                      | 51           | 0            |
| 9        | HMPA/DMSO (1/1, 0.05 M) | Ni(NTf <sub>2</sub> ) <sub>2</sub>                 | 4-CzIPN                                       | Hantzsch ester          | -                                      | 51           | 0            |
| 10       | HMPA/DMSO (1/1, 0.25 M) | Ni(NTf <sub>2</sub> ) <sub>2</sub>                 | 4-CzIPN                                       | Hantzsch ester          | -                                      | 48           | 0            |
| 11       | HMPA/DMSO (1/1)         | Ni(NTf <sub>2</sub> ) <sub>2</sub>                 | 4-CzIPN                                       | Hantzsch ester          | DIPEA (0.5 eq) additive as an additive | 24           | 0            |
| 12       | HMPA/DMSO (1/1)         | Ni(NTf <sub>2</sub> ) <sub>2</sub>                 | 4-CzIPN                                       | Hantzsch ester          | 365 nm LEDs                            | 0            | 3            |
| 13       | HMPA/DMSO (1/1)         | Ni(NTf <sub>2</sub> ) <sub>2</sub>                 | 4-CzIPN                                       | Hantzsch ester          | 405 nm LEDs                            | 46           | 4            |
| 14       | HMPA/DMSO (1/1)         | Ni(NTf <sub>2</sub> ) <sub>2</sub>                 | 4-CzIPN                                       | Hantzsch ester          | on air                                 | 0            | 0            |

<sup>a</sup>Reaction scale: **1a** (0.1 mmol), **2a** (0.2 mmol); <sup>b</sup>Yields were determined by <sup>1</sup>H NMR spectroscopy using 1,3,5-trimethoxybenzene as an internal standard.

### Radical inhibition experiment in the presence of BHT



A reaction tube with a magnetic stir bar was charged with 4,4'-(propa-1,2-diene-1,1-diyl)bis(fluorobenzene) **1a** (0.1 mmol, 1 eq), Ni(NTf<sub>2</sub>)<sub>2</sub> (10 mol%), pyphos (12 mol%), 4-CzIPN (2 mol%), Hantzsch ester (2.0 eq), and BHT (3.0 eq). The reaction tube was sealed with a PTFE/silicon septa cap and tube was evacuated and re-filled with argon for two times. HMPA/DMSO (1/1, 1 mL) and benzaldehyde **2a** (2.0 eq) were added under argon counter flow. The reaction mixture was stirred at room temperature under visible-light irradiation using 450 nm LEDs (18 W). After 18 h, 1,3,5-trimethoxybenzene was added as an internal standard. The

reaction mixture was diluted with ethyl acetate and washed with brine. The layers were separated, and the organic layer was dried with  $\text{MgSO}_4$ , filtered, and concentrated in vacuo to give a crude residue. The crude residue was dissolved in deuteriochloroform and the yield was determined by  $^1\text{H}$  NMR spectroscopy with 1,3,5-trimethoxybenzene as an internal standard.

### Scheme S1. *E/Z* isomerization of **3fa**<sup>a,b</sup>



<sup>a</sup>Reaction scale: **1f** (0.1 mmol), **2a** (0.2 mmol); <sup>b</sup> The ratio of *E/Z* isomers was determined by gas chromatography.

### Reactions with chiral P<sup>^</sup>N ligands



A reaction tube with a magnetic stir bar was charged with 4,4'-(propa-1,2-diene-1,1-diyl)bis(fluorobenzene) **1a** (0.1 mmol, 1 eq),  $\text{Ni}(\text{NTf}_2)_2$  (10 mol%), ligand (12 mol%), 4-CzIPN

(2 mol%), Hantzsch ester (2.0 eq), and BHT (3.0 eq). The reaction tube was sealed with a PTFE/silicon septa cap and tube was evacuated and re-filled with argon for two times. HMPA/DMSO (1/1, 1 mL) and benzaldehyde **2a** (2.0 eq) were added under argon counter flow. The reaction mixture was stirred at room temperature under visible-light irradiation using 450 nm LEDs (18 W). After 18 h, 1,3,5-trimethoxybenzene was added as an internal standard. The reaction mixture was diluted with ethyl acetate and washed with brine. The layers were separated, and the organic layer was dried with MgSO<sub>4</sub>, filtered, and concentrated in vacuo to give a crude residue. The crude residue was filtered using syringe filter and dissolved in hexanes/EtOH (1/1). The enantiomeric excess (*ee*) was determined by HPLC analysis on chiral stationary column.

## HPLC traces

Result with pyphos

Proc. Chnl. Descr.:2998 PDA 254.0



Result with L10

Proc. Chnl. Descr.:2998 PDA 254.0



Result with **L15**

Proc. Chnl. Descr.:2998 PDA 254.0



Result with **L16**

Proc. Chnl. Descr.:2998 PDA 254.0



Result with **L17**

Proc. Chnl. Descr.:2998 PDA 254.0



Result with **L18**

Proc. Chnl. Descr.:2998 PDA 254.0



## Analytic Data for Synthesized Compounds



4,4-bis(4-fluorophenyl)-1-phenylbut-3-en-1-ol, **3aa**;  $^1\text{H NMR}$  (600 MHz,  $\text{CDCl}_3$ ) 7.38 – 7.32 (m, 2H), 7.31 – 7.27 (m, 3H), 7.11 (ddd,  $J = 8.4, 2.5$  Hz,  $J_{\text{H-F}} = 5.2$  Hz, 2H), 7.04 – 6.98 (m, 4H), 6.96 – 6.91 (m, 2H), 6.06 (dd,  $J = 7.5, 7.5$  Hz, 1H), 4.81 (dd,  $J = 6.5, 6.5$  Hz, 1H), 2.60 (ddd,  $J = 14.7, 7.5, 6.5$  Hz, 1H), 2.54 (ddd,  $J = 14.7, 7.5, 6.5$  Hz, 1H), 1.90 (bs, 1H);  $^{13}\text{C NMR}$  (151 MHz,  $\text{CDCl}_3$ )  $\delta$  162.40 (d,  $J_{\text{C-F}} = 246.1$  Hz), 162.19 (d,  $J_{\text{C-F}} = 246.5$  Hz), 144.07, 142.45, 138.64, 135.65 (d,  $J_{\text{C-F}} = 3.3$  Hz), 131.61 (d,  $J_{\text{C-F}} = 7.8$  Hz), 128.98 (d,  $J_{\text{C-F}} = 8.1$  Hz), 128.71, 127.95, 126.05, 25.23, 115.46 (d,  $J_{\text{C-F}} = 21.4$  Hz), 115.19 (d,  $J_{\text{C-F}} = 21.4$  Hz), 74.53, 39.60;  $^{19}\text{F NMR}$  (564 MHz,  $\text{CDCl}_3$ )  $\delta$  -115.06, -115.45; **HRMS**  $m/z$  (FAB) calc. for  $\text{C}_{22}\text{H}_{17}\text{F}_2$   $[\text{M}-\text{H}_2\text{O}+\text{H}]^+$  319.1298, found 319.1296;  $R_f$  0.40 (Hex/EtOAc, 4/1).



4,4-bis(4-fluorophenyl)-1-(*o*-tolyl)but-3-en-1-ol, **3ab**;  $^1\text{H NMR}$  (600 MHz,  $\text{CDCl}_3$ )  $\delta$  7.43 (d,  $J = 7.8$  Hz, 1H), 7.21 (dd,  $J = 7.8, 7.4$  Hz, 1H), 7.17 (dd,  $J = 7.5, 7.4$  Hz, 1H), 7.14 (dd,  $J = 8.8$  Hz,  $J_{\text{H-F}} = 5.4$  Hz, 2H), 7.10 (d,  $J = 7.5$  Hz, 1H), 7.05 – 6.97 (m, 4H), 6.94 (dd,  $J = 8.8$  Hz,  $J_{\text{H-F}} = 8.7$  Hz, 2H), 6.15 (t,  $J = 7.5$  Hz, 1H), 5.04 (t,  $J = 6.3$  Hz, 1H), 2.52 (dd,  $J = 7.5, 6.3$  Hz, 2H), 2.21 (s, 3H), 1.82 (bs, 1H);  $^{13}\text{C NMR}$  (151 MHz,  $\text{CDCl}_3$ )  $\delta$  162.39 (d,  $J_{\text{C-F}} = 246.5$  Hz), 162.20 (d,  $J_{\text{C-F}} = 246.5$  Hz), 142.36, 142.19, 138.57 (d,  $J_{\text{C-F}} = 3.2$  Hz), 135.68 (d,  $J_{\text{C-F}} = 3.2$  Hz), 134.56, 131.61 (d,  $J_{\text{C-F}} = 8.1$  Hz), 130.63, 128.91 (d,  $J_{\text{C-F}} = 8.1$  Hz), 127.59, 126.51, 125.47, 115.48 (d,  $J_{\text{C-F}} = 21.4$  Hz), 115.20 (d,  $J_{\text{C-F}} = 21.4$  Hz), 70.88, 38.25, 19.14 (one carbon signal is missing due to the overlap of aromatic carbon peaks);  $^{19}\text{F NMR}$  (564 MHz,  $\text{CDCl}_3$ )  $\delta$  -115.11, -115.49; **HRMS**  $m/z$  (FAB) calc. for  $\text{C}_{23}\text{H}_{19}\text{F}_2$   $[\text{M}-\text{H}_2\text{O}+\text{H}]^+$  333.1455, found 333.1458;  $R_f$  0.45 (Hex/EtOAc, 4/1).



4,4-bis(4-fluorophenyl)-1-(*m*-tolyl)but-3-en-1-ol, **3ac**;  $^1\text{H NMR}$  (600 MHz,  $\text{CDCl}_3$ )  $\delta$  7.24 – 7.20 (m, 1H), 7.13 – 7.07 (m, 5H), 7.04 – 6.98 (m, 4H), 6.95 – 6.91 (m, 2H), 6.06 (dd,  $J = 7.5, 7.4$  Hz, 1H), 4.79 – 4.75 (m, 1H), 2.62 – 2.49 (m, 2H), 2.34 (s, 3H), 1.88 (d,  $J = 3.1$  Hz, 1H);  $^{13}\text{C NMR}$  (151 MHz,  $\text{CDCl}_3$ )  $\delta$  162.39 (d,  $J_{\text{C-F}} = 246.5$  Hz), 162.18 (d,  $J_{\text{C-F}} = 246.2$  Hz), 144.03, 142.35, 138.71 (d,  $J_{\text{C-F}} = 3.2$  Hz), 138.39, 135.69 (d,  $J_{\text{C-F}} = 3.8$  Hz), 131.63 (d,  $J_{\text{C-F}} = 8.1$  Hz), 128.99 (d,  $J_{\text{C-F}} = 8.1$  Hz), 128.68, 128.59, 126.71, 125.42, 123.15, 115.43 (d,  $J_{\text{C-F}} = 21.4$  Hz), 115.17 (d,  $J_{\text{C-F}} = 21.4$  Hz), 74.56, 39.54, 21.66;  $^{19}\text{F NMR}$  (564 MHz,  $\text{CDCl}_3$ )  $\delta$  -115.12, -115.50; **HRMS**  $m/z$  (FAB) calc. for  $\text{C}_{23}\text{H}_{19}\text{F}_2$   $[\text{M}-\text{H}_2\text{O}+\text{H}]^+$  333.1455, found 333.1451;  $R_f$  0.43 (Hex/EtOAc, 4/1).



4,4-bis(4-fluorophenyl)-1-(*p*-tolyl)but-3-en-1-ol, **3ad**;  $^1\text{H NMR}$  (600 MHz,  $\text{CDCl}_3$ ) 7.18 (d,  $J = 8.0$  Hz, 2H), 7.14 (d,  $J = 8.0$  Hz, 2H), 7.12 (dd,  $J = 8.7$  Hz,  $J_{\text{H-F}} = 5.5$  Hz, 2H), 7.04 – 7.00 (m, 4H), 6.93 (dd,  $J_{\text{H-F}} = 8.7$  Hz,  $J = 8.7$  Hz, 2H), 6.05 (dd,  $J = 7.5$ , 7.3 Hz, 1H), 4.77 (dd,  $J = 7.5$ , 5.7 Hz, 1H), 2.59 (ddd,  $J = 14.8$ , 7.5, 7.5 Hz, 1H), 2.52 (ddd,  $J = 14.8$ , 7.3, 5.7 Hz, 1H), 2.34 (s, 3H);  $^{13}\text{C NMR}$  (151 MHz,  $\text{CDCl}_3$ )  $\delta$  162.39 (d,  $J_{\text{C-F}} = 246.8$  Hz), 162.19 (d,  $J_{\text{C-F}} = 246.5$  Hz), 142.30, 141.14, 138.71 (d,  $J_{\text{C-F}} = 2.9$  Hz), 137.65, 135.71 (d,  $J_{\text{C-F}} = 3.5$  Hz), 131.63 (d,  $J_{\text{C-F}} = 7.8$  Hz), 129.37, 128.99 (d,  $J_{\text{C-F}} = 8.1$  Hz), 126.00, 125.46 (d,  $J_{\text{C-F}} = 1.0$  Hz), 115.44 (d,  $J_{\text{C-F}} = 21.1$  Hz), 115.17 (d,  $J_{\text{C-F}} = 21.4$  Hz), 74.40, 39.57, 21.33;  $^{19}\text{F NMR}$  (564 MHz,  $\text{CDCl}_3$ )  $\delta$  -115.00, -115.41; **HRMS**  $m/z$  (FAB) calc. for  $\text{C}_{23}\text{H}_{19}\text{F}_2$  [ $\text{M}-\text{H}_2\text{O}+\text{H}$ ] $^+$  333.1455, found 333.1457;  $R_f$  0.40 (Hex/EtOAc, 4/1).



4,4-bis(4-fluorophenyl)-1-(2-methoxyphenyl)but-3-en-1-ol, **3ae**;  $^1\text{H NMR}$  (600 MHz,  $\text{CDCl}_3$ ) 7.27 – 7.22 (m, 2H), 7.11 (dd,  $J = 8.5$  Hz,  $J_{\text{H-F}} = 5.5$  Hz, 2H), 7.02 – 6.97 (m, 4H), 6.96 – 6.90 (m, 3H), 6.84 (d,  $J = 8.2$  Hz, 1H), 6.12 (dd,  $J = 7.5$ , 7.5 Hz, 1H), 4.99 – 4.95 (m, 1H), 3.75 (s, 3H), 2.64 – 2.58 (m, 2H);  $^{13}\text{C NMR}$  (151 MHz,  $\text{CDCl}_3$ )  $\delta$  162.31 (d,  $J_{\text{C-F}} = 246.2$  Hz), 162.10 (d,  $J_{\text{C-F}} = 245.8$  Hz), 156.68, 141.75, 138.85 (d,  $J_{\text{C-F}} = 3.8$  Hz), 135.89 (d,  $J_{\text{C-F}} = 3.5$  Hz), 131.79, 131.69 (d,  $J_{\text{C-F}} = 8.1$  Hz), 128.94 (d,  $J_{\text{C-F}} = 7.8$  Hz), 128.67, 127.21, 126.19, 120.95, 115.28 (d,  $J_{\text{C-F}} = 21.1$  Hz), 115.11 (d,  $J_{\text{C-F}} = 21.4$  Hz), 110.71, 71.32, 55.34, 37.74;  $^{19}\text{F NMR}$  (564 MHz,  $\text{CDCl}_3$ )  $\delta$  -115.46, -115.76; **HRMS**  $m/z$  (FAB) calc. for  $\text{C}_{23}\text{H}_{19}\text{F}_2\text{O}$  [ $\text{M}-\text{H}_2\text{O}+\text{H}$ ] $^+$  349.1404, found 349.1407;  $R_f$  0.39 (Hex/EtOAc, 4/1).



1-(2,6-dimethylphenyl)-4,4-bis(4-fluorophenyl)but-3-en-1-ol, **3af**;  $^1\text{H NMR}$  (600 MHz,  $\text{CDCl}_3$ ) 7.15 – 7.11 (m, 2H), 7.06 – 7.01 (m, 5H), 6.97 – 6.92 (m, 4H), 6.12 (dd,  $J = 7.7$ , 7.7 Hz, 1H), 5.27 (dd,  $J = 8.6$ , 6.0 Hz, 1H), 2.78 (ddd,  $J = 14.3$ , 8.6, 7.7 Hz, 1H), 2.54 (ddd,  $J = 14.3$ , 7.7, 6.0 Hz, 1H), 2.33 (s, 6H), 1.81 (bs, 1H);  $^{13}\text{C NMR}$  (151 MHz,  $\text{CDCl}_3$ )  $\delta$  162.39 (d,  $J_{\text{C-F}} = 246.4$  Hz), 162.22 (d,  $J_{\text{C-F}} = 246.1$  Hz), 142.29, 139.00, 138.49 (d,  $J_{\text{C-F}} = 3.8$  Hz), 135.64 (d,  $J_{\text{C-F}} = 3.7$  Hz), 131.65 (d,  $J_{\text{C-F}} = 7.8$  Hz), 129.70, 128.86 (d,  $J_{\text{C-F}} = 7.8$  Hz), 128.25, 127.49, 125.81, 115.49 (d,  $J_{\text{C-F}} = 21.4$  Hz), 115.22 (d,  $J_{\text{C-F}} = 21.4$  Hz), 71.58, 36.04, 20.94;  $^{19}\text{F NMR}$  (564 MHz,  $\text{CDCl}_3$ )  $\delta$  -115.12, -115.47; **HRMS**  $m/z$  (FAB) calc. for  $\text{C}_{24}\text{H}_{21}\text{F}_2$  [ $\text{M}-\text{H}_2\text{O}+\text{H}$ ] $^+$  347.1611, found 347.1609;  $R_f$  0.46 (Hex/EtOAc, 4/1).



4,4-bis(4-fluorophenyl)-1-mesitylbut-3-en-1-ol, **3ag**;  $^1\text{H NMR}$  (600 MHz,  $\text{CDCl}_3$ )  $\delta$  7.13 (dd,  $J = 8.5$  Hz,  $J_{\text{H-F}} = 5.4$  Hz, 2H), 7.05 – 7.00 (m, 4H), 6.94 (dd,  $J_{\text{H-F}} = 8.8$  Hz,  $J = 8.5$  Hz, 2H), 6.79 (s, 2H), 6.11 (dd,  $J = 7.6$ , 7.6 Hz, 1H), 5.23 (dd,  $J = 8.7$ , 6.0 Hz, 1H), 2.77 (ddd,  $J = 14.1$ , 8.7, 7.6 Hz, 1H), 2.51 (ddd,  $J = 14.1$ , 7.6, 6.0 Hz, 1H), 2.29 (s, 6H), 2.24 (s, 3H);  $^{13}\text{C NMR}$  (151 MHz,  $\text{CDCl}_3$ )  $\delta$  162.37 (d,  $J_{\text{C-F}} = 246.5$  Hz), 162.21 (d,  $J_{\text{C-F}} = 246.2$  Hz), 142.15, 138.53 (d,  $J_{\text{C-F}} = 3.1$  Hz), 137.00, 136.23, 136.10, 135.68 (d,  $J_{\text{C-F}} = 3.4$  Hz), 131.66 (d,  $J_{\text{C-F}} = 8.1$  Hz), 130.42, 128.86 (d,  $J_{\text{C-F}} = 7.8$  Hz), 126.00, 115.46 (d,  $J_{\text{C-F}} = 21.4$  Hz), 115.20 (d,  $J_{\text{C-F}} = 21.4$  Hz), 71.44, 36.16, 20.92, 20.82;  $^{19}\text{F NMR}$  (564 MHz,  $\text{CDCl}_3$ )  $\delta$  -115.18, -115.53; **HRMS**  $m/z$  (FAB) calc. for  $\text{C}_{25}\text{H}_{23}\text{F}_2$   $[\text{M}-\text{H}_2\text{O}+\text{H}]^+$  361.1768, found 361.1769;  $R_f$  0.47 (Hex/EtOAc, 4/1).



*N*-(4-(4,4-bis(4-fluorophenyl)-1-hydroxybut-3-en-1-yl)phenyl)acetamide, **3ah**;  $^1\text{H NMR}$  (600 MHz,  $\text{CDCl}_3$ )  $\delta$  7.46 (d,  $J = 8.2$  Hz, 2H), 7.26 – 7.23 (m, 2H), 7.15 (bs, 1H), 7.10 (dd,  $J = 8.9$  Hz,  $J_{\text{H-F}} = 5.4$  Hz, 2H), 7.03 – 7.00 (m, 4H), 6.93 (dd,  $J_{\text{H-F}} = 9.7$  Hz,  $J = 8.9$  Hz, 2H), 6.02 (dd,  $J = 7.2$ , 7.2 Hz, 1H), 4.77 (dd,  $J = 6.5$ , 6.5 Hz, 1H), 2.58 (ddd,  $J = 14.7$ , 7.4, 6.5 Hz, 1H), 2.51 (ddd,  $J = 14.2$ , 7.4, 6.5 Hz, 1H), 2.18 (s, 3H);  $^{13}\text{C NMR}$  (151 MHz,  $\text{CDCl}_3$ )  $\delta$  168.41, 162.41 (d,  $J_{\text{C-F}} = 246.6$  Hz), 162.21 (d,  $J_{\text{C-F}} = 246.3$  Hz), 142.52, 140.02, 138.61 (d,  $J_{\text{C-F}} = 4.0$  Hz), 137.52, 135.63 (d,  $J_{\text{C-F}} = 2.8$  Hz), 131.61 (d,  $J_{\text{C-F}} = 7.8$  Hz), 128.98 (d,  $J_{\text{C-F}} = 8.1$  Hz), 126.76, 125.08, 120.10, 115.50 (d,  $J_{\text{C-F}} = 21.1$  Hz), 115.20 (d,  $J_{\text{C-F}} = 21.4$  Hz), 74.06, 39.53, 24.85;  $^{19}\text{F NMR}$  (564 MHz,  $\text{CDCl}_3$ )  $\delta$  -114.97, -115.42; **HRMS**  $m/z$  (FAB) calc. for  $\text{C}_{24}\text{H}_{22}\text{F}_2\text{NO}_2$   $[\text{M}+\text{H}]^+$  394.1619, found 349.1617;  $R_f$  0.13 (Hex/EtOAc, 1/1).



1-(2-chlorophenyl)-4,4-bis(4-fluorophenyl)but-3-en-1-ol, **3ai**;  $^1\text{H NMR}$  (600 MHz,  $\text{CDCl}_3$ )  $\delta$  7.29 – 7.28 (m, 1H), 7.26 – 7.24 (m, 2H), 7.16 – 7.14 (m, 1H), 7.11 (dd,  $J = 8.8$  Hz,  $J_{\text{H-F}} = 5.5$  Hz, 2H), 7.07 – 7.01 (m, 2H), 6.99 (dd,  $J = 8.5$  Hz,  $J_{\text{H-F}} = 5.7$  Hz, 2H), 6.97 – 6.91 (m, 2H), 6.03 (dd,  $J = 7.5$ , 7.5 Hz, 1H), 4.79 (dd,  $J = 7.1$ , 5.7 Hz, 1H), 2.61 – 2.49 (m, 2H), 1.97 (bs, 1H);  $^{13}\text{C NMR}$  (151 MHz,  $\text{CDCl}_3$ )  $\delta$  162.45 (d,  $J_{\text{C-F}} = 246.8$  Hz), 162.23 (d,  $J_{\text{C-F}} = 246.5$  Hz), 146.08, 142.93, 138.50 (d,  $J_{\text{C-F}} = 3.5$  Hz), 135.49 (d,  $J_{\text{C-F}} = 3.8$  Hz), 134.64, 131.53 (d,  $J_{\text{C-F}} = 7.8$  Hz), 129.93, 128.98 (d,  $J_{\text{C-F}} = 7.8$  Hz), 127.99, 126.27, 124.54, 124.21, 115.54 (d,  $J_{\text{C-F}} = 21.1$  Hz), 115.24 (d,  $J_{\text{C-F}} = 21.4$  Hz), 73.82, 39.48;  $^{19}\text{F NMR}$  (564 MHz,  $\text{CDCl}_3$ )  $\delta$  -114.81, -115.23; **HRMS**  $m/z$  (FAB) calc. for  $\text{C}_{22}\text{H}_{16}\text{ClF}_2$   $[\text{M}-\text{H}_2\text{O}+\text{H}]^+$  353.0909, found 353.0905;  $R_f$  0.47 (Hex/EtOAc, 4/1).



1-(3-chlorophenyl)-4,4-bis(4-fluorophenyl)but-3-en-1-ol, **3aj**;  $^1\text{H NMR}$  (600 MHz,  $\text{CDCl}_3$ )  $\delta$  7.30 – 7.28 (m, 1H), 7.26 – 7.24 (m, 2H), 7.17 – 7.14 (m, 1H), 7.11 (dd,  $J = 8.8$  Hz,  $J_{\text{H-F}} = 5.4$  Hz, 2H), 7.05 – 7.02 (m, 2H), 6.99 (dd,  $J = 8.4$  Hz,  $J_{\text{H-F}} = 5.9$  Hz, 2H), 6.97 – 6.91 (m, 2H), 6.02 (dd,  $J = 7.5$ , 7.5 Hz, 1H), 4.79 (dd,  $J = 6.4$ , 6.4 Hz, 1H), 2.61 – 2.49 (m, 2H);

$^{13}\text{C NMR}$  (151 MHz,  $\text{CDCl}_3$ )  $\delta$  162.46 (d,  $J_{\text{C-F}} = 246.7$  Hz), 162.24 (d,  $J_{\text{C-F}} = 246.7$  Hz), 146.09, 142.95, 138.50 (d,  $J_{\text{C-F}} = 3.1$  Hz), 135.50 (d,  $J_{\text{C-F}} = 3.2$  Hz), 134.66, 131.54 (d,  $J_{\text{C-F}} = 8.1$  Hz), 129.94, 128.99 (d,  $J_{\text{C-F}} = 8.1$  Hz), 128.01, 126.28, 124.54, 124.22, 115.55 (d,  $J_{\text{C-F}} = 21.4$  Hz), 115.24 (d,  $J_{\text{C-F}} = 21.7$  Hz), 73.82, 39.49;  $^{19}\text{F NMR}$  (564 MHz,  $\text{CDCl}_3$ )  $\delta$  -114.82, -115.23; **HRMS**  $m/z$  (FAB) calc. for  $\text{C}_{22}\text{H}_{16}\text{ClF}_2$   $[\text{M}-\text{H}_2\text{O}+\text{H}]^+$  353.0909, found 353.0912;  $R_f$  0.38 (Hex/EtOAc, 4/1).



1-(4-chlorophenyl)-4,4-bis(4-fluorophenyl)but-3-en-1-ol, **3ak**;  $^1\text{H NMR}$  (600 MHz,  $\text{CDCl}_3$ )  $\delta$  7.30 (d,  $J = 8.5$  Hz, 2H), 7.22 (d,  $J = 8.5$  Hz, 2H), 7.11 (dd,  $J = 8.7$  Hz,  $J_{\text{H-F}} = 5.4$  Hz, 2H), 7.03 (dd,  $J_{\text{H-F}} = 8.7$  Hz,  $J = 8.7$  Hz, 2H), 6.99 (dd,  $J = 8.5$  Hz,  $J_{\text{H-F}} = 5.8$  Hz, 2H), 6.94 (dd,  $J_{\text{H-F}} = 8.7$  Hz,  $J = 8.5$  Hz, 2H), 6.02 (dd,  $J = 7.5$ , 7.5 Hz, 1H), 4.79 (dd,  $J = 6.4$ , 6.4 Hz,

1H), 2.61 – 2.47 (m, 2H);  $^{13}\text{C NMR}$  (151 MHz,  $\text{CDCl}_3$ )  $\delta$  162.46 (d,  $J_{\text{C-F}} = 246.8$  Hz), 162.23 (d,  $J_{\text{C-F}} = 246.5$  Hz), 142.86, 142.50, 138.49 (d,  $J_{\text{C-F}} = 3.2$  Hz), 135.52 (d,  $J_{\text{C-F}} = 3.5$  Hz), 133.58, 131.55 (d,  $J_{\text{C-F}} = 7.8$  Hz), 128.97 (d,  $J_{\text{C-F}} = 8.1$  Hz), 128.81, 127.43, 124.60, 115.52 (d,  $J_{\text{C-F}} = 21.4$  Hz), 115.25 (d,  $J_{\text{C-F}} = 21.4$  Hz), 73.79, 39.58;  $^{19}\text{F NMR}$  (564 MHz,  $\text{CDCl}_3$ )  $\delta$  -114.83, -115.22; **HRMS**  $m/z$  (FAB) calc. for  $\text{C}_{22}\text{H}_{16}\text{ClF}_2$   $[\text{M}-\text{H}_2\text{O}+\text{H}]^+$  353.0909, found 353.0906;  $R_f$  0.35 (Hex/EtOAc, 4/1).



1,4,4-tris(4-fluorophenyl)but-3-en-1-ol, **3al**;  $^1\text{H NMR}$  (600 MHz,  $\text{CDCl}_3$ )  $\delta$  7.26 (dd,  $J = 8.4$  Hz,  $J_{\text{H-F}} = 5.6$  Hz, 2H), 7.11 (dd,  $J = 8.8$  Hz,  $J_{\text{H-F}} = 5.4$  Hz, 2H), 7.05 – 6.98 (m, 6H), 6.95 – 6.92 (m, 2H), 6.02 (dd,  $J = 7.5$ , 7.3 Hz, 1H), 4.80 (dd,  $J = 7.1$ , 5.8 Hz, 1H), 2.58 (ddd,  $J = 14.8$ , 7.5, 7.1 Hz, 1H), 2.51 (ddd,  $J = 14.6$ , 7.3, 5.8 Hz, 1H), 1.90 (bs, 1H);  $^{13}\text{C NMR}$  (151

**MHz,  $\text{CDCl}_3$ )  $\delta$  162.23 (d,  $J_{\text{C-F}} = 245.6$  Hz), 162.21 (d,  $J_{\text{C-F}} = 246.8$  Hz), 161.99 (d,  $J_{\text{C-F}} = 246.5$  Hz), 142.48, 139.55 (d,  $J_{\text{C-F}} = 2.9$  Hz), 138.32 (d,  $J_{\text{C-F}} = 3.5$  Hz), 135.34 (d,  $J_{\text{C-F}} = 3.5$  Hz), 131.33 (d,  $J_{\text{C-F}} = 7.8$  Hz), 128.73 (d,  $J_{\text{C-F}} = 7.8$  Hz), 127.47 (d,  $J_{\text{C-F}} = 8.1$  Hz), 124.61, 115.28 (d,  $J_{\text{C-F}} = 21.2$  Hz), 115.27 (d,  $J_{\text{C-F}} = 21.4$  Hz), 115.00 (d,  $J_{\text{C-F}} = 21.4$  Hz), 73.61, 39.42;  $^{19}\text{F NMR}$  (564 MHz,  $\text{CDCl}_3$ )  $\delta$  -114.78, -114.86, -115.26; **HRMS**  $m/z$  (FAB) calc. for  $\text{C}_{22}\text{H}_{16}\text{F}_3$   $[\text{M}-\text{H}_2\text{O}+\text{H}]^+$  337.1204, found 337.1201;  $R_f$  0.32 (Hex/EtOAc, 4/1).**



1-(4-bromophenyl)-4,4-bis(4-fluorophenyl)but-3-en-1-ol, **3am**;  $^1\text{H}$  NMR (600 MHz,  $\text{CDCl}_3$ )  $\delta$  7.45 (d,  $J = 8.4$  Hz, 2H), 7.16 (d,  $J = 8.4$  Hz, 2H), 7.11 (dd,  $J = 8.9$  Hz,  $J_{\text{H-F}} = 5.4$  Hz, 2H), 7.03 (dd,  $J_{\text{H-F}} = 8.8$  Hz,  $J = 8.6$  Hz, 2H), 6.99 (dd,  $J = 8.6$  Hz,  $J_{\text{H-F}} = 5.7$  Hz, 2H), 6.94 (dd,  $J = 8.9$  Hz,  $J_{\text{H-F}} = 8.5$  Hz, 2H), 6.02 (dd,  $J = 7.5, 7.5$  Hz, 1H), 4.77 (dd,  $J = 6.5, 6.4$  Hz, 1H), 2.65 – 2.48 (m, 2H);  $^{13}\text{C}$  NMR (151 MHz,  $\text{CDCl}_3$ )  $\delta$  162.46 (d,  $J_{\text{C-F}} = 246.8$  Hz), 162.22 (d,  $J_{\text{C-F}} = 246.5$  Hz), 143.02, 142.88, 138.48 (d,  $J_{\text{C-F}} = 3.4$  Hz), 135.50 (d,  $J_{\text{C-F}} = 3.5$  Hz), 131.75, 131.54 (d,  $J_{\text{C-F}} = 7.8$  Hz), 128.96 (d,  $J_{\text{C-F}} = 8.1$  Hz), 127.78, 124.54, 121.65, 115.52 (d,  $J_{\text{C-F}} = 21.4$  Hz), 115.25 (d,  $J_{\text{C-F}} = 21.4$  Hz), 73.82, 39.54;  $^{19}\text{F}$  NMR (564 MHz,  $\text{CDCl}_3$ )  $\delta$  -114.69, -115.08; HRMS  $m/z$  (FAB) calc. for  $\text{C}_{22}\text{H}_{16}\text{BrF}_2$   $[\text{M}-\text{H}_2\text{O}+\text{H}]^+$  397.0403, found 397.0407;  $R_f$  0.36 (Hex/EtOAc, 4/1).



4,4-bis(4-fluorophenyl)-1-(3-(trifluoromethyl)phenyl)but-3-en-1-ol, **3an**;  $^1\text{H}$  NMR (600 MHz,  $\text{CDCl}_3$ )  $\delta$  7.56 (s, 1H), 7.55 – 7.52 (m, 1H), 7.48 – 7.42 (m, 2H), 7.10 (dd,  $J = 8.9$  Hz,  $J_{\text{H-F}} = 5.4$  Hz, 2H), 7.04 – 7.00 (m, 2H), 6.97 – 6.91 (m, 4H), 6.03 (dd,  $J = 7.5, 7.4$  Hz, 1H), 4.89 (dd,  $J = 6.4, 6.3$  Hz, 1H), 2.64 – 2.52 (m, 2H), 2.02 (bs, 1H);  $^{13}\text{C}$  NMR (151 MHz,  $\text{CDCl}_3$ )  $\delta$  162.49 (d,  $J_{\text{C-F}} = 246.8$  Hz), 162.26 (d,  $J_{\text{C-F}} = 246.8$  Hz), 144.97, 143.18, 138.44 (d,  $J_{\text{C-F}} = 3.2$  Hz), 135.44 (d,  $J_{\text{C-F}} = 3.2$  Hz), 131.47 (d,  $J_{\text{C-F}} = 7.8$  Hz), 131.03 (q,  $J_{\text{C-F}} = 31.9$  Hz), 129.42, 129.10, 128.97 (d,  $J_{\text{C-F}} = 8.0$  Hz), 124.66 (q,  $J_{\text{C-F}} = 3.8$  Hz), 124.31 (q,  $J_{\text{C-F}} = 272.5$  Hz), 124.25, 122.89 (q,  $J_{\text{C-F}} = 3.8$  Hz), 115.55 (d,  $J_{\text{C-F}} = 21.4$  Hz), 115.26 (d,  $J_{\text{C-F}} = 21.4$  Hz), 73.83, 39.58;  $^{19}\text{F}$  NMR (564 MHz,  $\text{CDCl}_3$ )  $\delta$  -62.60, -114.75, -115.14; HRMS  $m/z$  (FAB) calc. for  $\text{C}_{23}\text{H}_{16}\text{F}_5$   $[\text{M}-\text{H}_2\text{O}+\text{H}]^+$  387.1172, found 387.1174;  $R_f$  0.38 (Hex/EtOAc, 4/1).



4,4-bis(4-fluorophenyl)-1-(4-(trifluoromethyl)phenyl)but-3-en-1-ol, **3ao**;  $^1\text{H}$  NMR (600 MHz,  $\text{CDCl}_3$ )  $\delta$  7.58 (d,  $J = 8.0$  Hz, 2H), 7.40 (d,  $J = 8.0$  Hz, 2H), 7.12 (dd,  $J = 8.6$  Hz,  $J_{\text{H-F}} = 5.4$  Hz, 2H), 7.03 – 7.00 (m, 2H), 6.98 – 6.93 (m, 4H), 6.05 (dd,  $J = 7.5, 7.4$  Hz, 1H), 4.88 (dd,  $J = 6.5, 6.4$  Hz, 1H), 2.61 – 2.53 (m, 2H);  $^{13}\text{C}$  NMR (151 MHz,  $\text{CDCl}_3$ )  $\delta$  162.50 (d,  $J_{\text{C-F}} = 247.1$  Hz), 162.24 (d,  $J_{\text{C-F}} = 246.5$  Hz), 147.96, 143.17, 138.40 (d,  $J_{\text{C-F}} = 3.4$  Hz), 135.42 (d,  $J_{\text{C-F}} = 3.4$  Hz), 131.49 (d,  $J_{\text{C-F}} = 8.0$  Hz), 130.07 (q,  $J_{\text{C-F}} = 32.8$  Hz), 128.96 (d,  $J_{\text{C-F}} = 8.1$  Hz), 126.32, 126.17 (q,  $J_{\text{C-F}} = 276.2$  Hz), 125.60 (q,  $J_{\text{C-F}} = 3.8$  Hz), 124.22, 115.55 (d,  $J_{\text{C-F}} = 21.3$  Hz), 115.28 (d,  $J_{\text{C-F}} = 21.4$  Hz), 73.81, 39.62;  $^{19}\text{F}$  NMR (564 MHz,  $\text{CDCl}_3$ )  $\delta$  -62.49, -114.71, -115.08; HRMS  $m/z$  (FAB) calc. for  $\text{C}_{23}\text{H}_{16}\text{F}_5$   $[\text{M}-\text{H}_2\text{O}+\text{H}]^+$  387.1172, found 387.1170;  $R_f$  0.35 (Hex/EtOAc, 4/1).



1-(3,4-difluorophenyl)-4,4-bis(4-fluorophenyl)but-3-en-1-ol, **3ap**;  $^1\text{H}$  NMR (600 MHz,  $\text{CDCl}_3$ )  $\delta$  7.14 – 7.08 (m, 4H), 7.06 – 7.01 (m, 4H), 7.00 – 6.97 (m, 1H), 6.96 – 6.92 (m, 2H), 6.01 (dd,  $J = 7.5, 7.4$  Hz, 1H), 4.77 (dd,  $J = 7.1, 5.7$  Hz, 1H), 2.59 – 2.47 (m, 2H);  $^{13}\text{C}$  NMR (151 MHz,  $\text{CDCl}_3$ )  $\delta$  162.50 (d,  $J_{\text{C-F}} = 247.1$  Hz), 162.27 (d,  $J_{\text{C-F}} = 246.8$  Hz), 150.58 (dd,  $J_{\text{C-F}} = 248.8, 12.7$  Hz), 149.90 (dd,  $J_{\text{C-F}} = 247.9, 12.8$  Hz), 143.13, 141.10 (dd,  $J_{\text{C-F}} = 5.0, 3.6$  Hz), 138.41 (d,  $J_{\text{C-F}} = 3.5$  Hz), 135.45 (d,  $J_{\text{C-F}} = 3.3$  Hz), 131.53 (d,  $J_{\text{C-F}} = 8.1$  Hz), 128.97 (d,  $J_{\text{C-F}} = 8.1$  Hz), 124.28, 121.93 (dd,  $J_{\text{C-F}} = 6.2, 3.6$  Hz), 117.35 (d,  $J_{\text{C-F}} = 17.1$  Hz), 115.59 (d,  $J_{\text{C-F}} = 21.4$  Hz), 115.29 (d,  $J_{\text{C-F}} = 21.4$  Hz), 115.06 (d,  $J_{\text{C-F}} = 17.9$  Hz), 73.33, 39.58;  $^{19}\text{F}$  NMR (564 MHz,  $\text{CDCl}_3$ )  $\delta$  -114.65, -115.08, -137.33, -139.37; HRMS  $m/z$  (FAB) calc. for  $\text{C}_{22}\text{H}_{15}\text{F}_4$   $[\text{M}-\text{H}_2\text{O}+\text{H}]^+$  355.1110, found 355.1107;  $R_f$  0.30 (Hex/EtOAc, 4/1).



1-(3-bromo-4-fluorophenyl)-4,4-bis(4-fluorophenyl)but-3-en-1-ol, **3aq**;  $^1\text{H}$  NMR (600 MHz,  $\text{CDCl}_3$ ) 7.49 (dd,  $J_{\text{H-F}} = 6.6$  Hz,  $J = 2.2$  Hz, 1H), 7.18 (ddd,  $J = 8.6, 2.2$  Hz,  $J_{\text{H-F}} = 4.7$  Hz, 1H), 7.11 (dd,  $J = 8.9$  Hz,  $J_{\text{H-F}} = 5.3$  Hz, 2H), 7.08 – 7.03 (m, 3H), 6.99 (dd,  $J = 8.7$  Hz,  $J_{\text{H-F}} = 5.5$  Hz, 2H), 6.94 (dd,  $J = 8.9, 8.6$  Hz, 2H), 6.00 (dd,  $J = 7.5, 7.4$  Hz, 1H), 4.77 (dd,  $J = 6.5, 6.4$  Hz, 1H), 2.60 – 2.47 (m, 2H), 1.76 (bs, 1H);  $^{13}\text{C}$  NMR (151 MHz,  $\text{CDCl}_3$ )  $\delta$  162.50 (d,  $J_{\text{C-F}} = 246.8$  Hz), 162.26 (d,  $J_{\text{C-F}} = 246.8$  Hz), 158.62 (d,  $J_{\text{C-F}} = 247.3$  Hz), 143.16, 141.40 (d,  $J_{\text{C-F}} = 3.8$  Hz), 138.41 (d,  $J_{\text{C-F}} = 3.2$  Hz), 135.43 (d,  $J_{\text{C-F}} = 3.9$  Hz), 131.51 (d,  $J_{\text{C-F}} = 8.1$  Hz), 131.22, 128.99 (d,  $J_{\text{C-F}} = 8.1$  Hz), 126.61 (d,  $J_{\text{C-F}} = 7.2$  Hz), 124.22, 116.52 (d,  $J_{\text{C-F}} = 22.5$  Hz), 115.60 (d,  $J_{\text{C-F}} = 21.4$  Hz), 115.28 (d,  $J_{\text{C-F}} = 21.7$  Hz), 109.28 (d,  $J_{\text{C-F}} = 21.1$  Hz), 73.21, 39.56;  $^{19}\text{F}$  NMR (564 MHz,  $\text{CDCl}_3$ )  $\delta$  -109.01, -114.65, -115.07; HRMS  $m/z$  (FAB) calc. for  $\text{C}_{22}\text{H}_{15}\text{BrF}_3$   $[\text{M}-\text{H}_2\text{O}+\text{H}]^+$  415.0309, found 415.0311;  $R_f$  0.29 (Hex/EtOAc, 4/1).



4,4-bis(4-fluorophenyl)-1-(thiophen-3-yl)but-3-en-1-ol, **3ar**;  $^1\text{H}$  NMR (600 MHz,  $\text{CDCl}_3$ )  $\delta$  7.29 (dd,  $J = 5.0, 3.0$  Hz, 1H), 7.17 (dd,  $J = 3.0, 1.2$  Hz, 1H), 7.12 (dd,  $J = 8.6$  Hz,  $J_{\text{H-F}} = 5.6$  Hz, 2H), 7.05 – 7.03 (m, 4H), 7.00 (dd,  $J = 5.0, 1.2$  Hz, 1H), 6.96 – 6.92 (m, 2H), 6.05 (dd,  $J = 7.5, 7.4$  Hz, 1H), 4.91 (dd,  $J = 6.4, 6.5$  Hz, 1H), 2.65 – 2.55 (m, 2H);  $^{13}\text{C}$  NMR (151 MHz,  $\text{CDCl}_3$ )  $\delta$  162.43 (d,  $J_{\text{C-F}} = 246.9$  Hz), 162.23 (d,  $J_{\text{C-F}} = 246.3$  Hz), 145.63, 142.55, 138.63, 135.69, 131.62 (d,  $J_{\text{C-F}} = 7.8$  Hz), 129.01 (d,  $J_{\text{C-F}} = 8.1$  Hz), 126.45, 125.84, 125.05, 121.10, 115.51 (d,  $J_{\text{C-F}} = 21.1$  Hz), 115.21 (d,  $J_{\text{C-F}} = 21.4$  Hz), 70.67, 38.94;  $^{19}\text{F}$  NMR (564 MHz,  $\text{CDCl}_3$ )  $\delta$  -112.45, -112.87; HRMS  $m/z$  (FAB) calc. for  $\text{C}_{20}\text{H}_{15}\text{F}_2\text{S}$   $[\text{M}-\text{H}_2\text{O}+\text{H}]^+$  325.0863, found 325.0864;  $R_f$  0.30 (Hex/EtOAc, 4/1).



4,4-bis(4-fluorophenyl)-1-(thiophen-2-yl)but-3-en-1-ol, **3as**;  $^1\text{H NMR}$  (600 MHz,  $\text{CDCl}_3$ )  $\delta$  7.25 (dd,  $J = 4.9, 1.3$  Hz, 1H), 7.13 (dd,  $J = 8.6$  Hz,  $J_{\text{H-F}} = 5.6$  Hz, 2H), 7.08 – 7.03 (m, 4H), 6.97 – 6.92 (m, 4H), 6.07 (dd,  $J = 7.5, 7.4$  Hz, 1H), 5.06 (dd,  $J = 6.6, 6.5$  Hz, 1H), 2.73 – 2.61 (m, 2H);  $^{13}\text{C NMR}$  (151 MHz,  $\text{CDCl}_3$ )  $\delta$  162.45 (d,  $J_{\text{C-F}} = 246.8$  Hz), 162.25 (d,  $J_{\text{C-F}} = 246.5$  Hz), 147.98, 142.78, 138.61 (d,  $J_{\text{C-F}} = 3.3$  Hz), 135.61 (d,  $J_{\text{C-F}} = 3.4$  Hz), 131.61 (d,  $J_{\text{C-F}} = 7.8$  Hz), 129.06 (d,  $J_{\text{C-F}} = 8.1$  Hz), 126.91, 124.99, 124.64, 124.03, 115.54 (d,  $J_{\text{C-F}} = 21.4$  Hz), 115.21 (d,  $J_{\text{C-F}} = 21.4$  Hz), 70.39, 39.70;  $^{19}\text{F NMR}$  (564 MHz,  $\text{CDCl}_3$ )  $\delta$  -112.44, -112.87; **HRMS**  $m/z$  (FAB) calc. for  $\text{C}_{20}\text{H}_{15}\text{F}_2\text{S}$   $[\text{M}-\text{H}_2\text{O}+\text{H}]^+$  325.0863, found 325.0865;  $R_f$  0.33 (Hex/EtOAc, 4/1).



4,4-bis(4-fluorophenyl)-1-(naphthalen-1-yl)but-3-en-1-ol, **3at**;  $^1\text{H NMR}$  (600 MHz,  $\text{CDCl}_3$ )  $\delta$  7.87 (d,  $J = 8.4$  Hz, 1H), 7.86 (d,  $J = 8.0$  Hz, 1H), 7.78 (d,  $J = 8.2$  Hz, 1H), 7.62 (d,  $J = 7.1$  Hz, 1H), 7.49 – 7.45 (m, 2H), 7.42 (ddd,  $J = 8.2, 6.8, 1.4$  Hz, 1H), 7.11 (dd,  $J = 8.7$  Hz,  $J_{\text{H-F}} = 5.6$  Hz, 2H), 6.95 – 6.94 (m, 4H), 6.93 – 6.91 (m, 2H), 6.21 (dd,  $J = 7.5, 7.5$  Hz, 1H), 5.58 (dd,  $J = 7.6, 4.9$  Hz, 1H), 2.80 (ddd,  $J = 14.9, 7.5, 4.9$  Hz, 1H), 2.70 (ddd,  $J = 14.9, 7.6, 7.5$  Hz, 1H), 1.75 (bs, 1H);  $^{13}\text{C NMR}$  (151 MHz,  $\text{CDCl}_3$ )  $\delta$  162.39 (d,  $J_{\text{C-F}} = 246.8$  Hz), 162.14 (d,  $J_{\text{C-F}} = 246.2$  Hz), 142.42, 139.63, 138.53 (d,  $J_{\text{C-F}} = 3.2$  Hz), 135.60 (d,  $J_{\text{C-F}} = 3.5$  Hz), 133.98, 131.53 (d,  $J_{\text{C-F}} = 8.1$  Hz), 130.43, 129.13, 128.92 (d,  $J_{\text{C-F}} = 8.1$  Hz), 128.33, 126.22, 125.80, 125.59, 125.56, 123.11, 123.08, 115.42 (d,  $J_{\text{C-F}} = 21.4$  Hz), 115.17 (d,  $J_{\text{C-F}} = 21.4$  Hz), 71.43, 38.45;  $^{19}\text{F NMR}$  (564 MHz,  $\text{CDCl}_3$ )  $\delta$  -115.04, -115.33; **HRMS**  $m/z$  (FAB) calc. for  $\text{C}_{26}\text{H}_{19}\text{F}_2$   $[\text{M}-\text{H}_2\text{O}+\text{H}]^+$  369.1455, found 369.1458;  $R_f$  0.36 (Hex/EtOAc, 4/1).



1-([1,1'-biphenyl]-4-yl)-4,4-bis(4-fluorophenyl)but-3-en-1-ol, **3au**;  $^1\text{H NMR}$  (600 MHz,  $\text{CDCl}_3$ )  $\delta$  7.60 – 7.55 (m, 4H), 7.46 – 7.42 (m, 2H), 7.39 – 7.33 (m, 3H), 7.13 (ddd,  $J = 8.9, 1.6$  Hz,  $J_{\text{H-F}} = 5.3$  Hz, 2H), 7.04 – 7.01 (m, 4H), 6.96 – 6.92 (m, 2H), 6.10 (dd,  $J = 7.5, 7.5$  Hz, 1H), 4.86 (dd,  $J = 6.6, 6.5$  Hz, 1H), 2.67 – 2.56 (m, 2H);  $^{13}\text{C NMR}$  (151 MHz,  $\text{CDCl}_3$ )  $\delta$  162.42 (d,  $J_{\text{C-F}} = 246.8$  Hz), 162.20 (d,  $J_{\text{C-F}} = 246.2$  Hz), 143.08, 142.57, 140.95, 140.90, 138.64 (d,  $J_{\text{C-F}} = 3.3$  Hz), 135.65 (d,  $J_{\text{C-F}} = 3.2$  Hz), 131.61 (d,  $J_{\text{C-F}} = 7.8$  Hz), 129.03, 128.99 (d,  $J_{\text{C-F}} = 8.0$  Hz), 127.58, 127.42, 127.27, 126.51, 125.15, 115.47 (d,  $J_{\text{C-F}} = 21.1$  Hz), 115.21 (d,  $J_{\text{C-F}} = 21.1$  Hz), 74.28, 39.59;  $^{19}\text{F NMR}$  (564 MHz,  $\text{CDCl}_3$ )  $\delta$  -114.86, -115.26; **HRMS**  $m/z$  (FAB) calc. for  $\text{C}_{28}\text{H}_{21}\text{F}_2$   $[\text{M}-\text{H}_2\text{O}+\text{H}]^+$  395.1611, found 395.1609;  $R_f$  0.30 (Hex/EtOAc, 4/1).



4,4-bis(4-fluorophenyl)-1-(4-(pyridin-2-yl)phenyl)but-3-en-1-ol, **3av**;  $^1\text{H NMR}$  (600 MHz,  $\text{CDCl}_3$ )  $\delta$  8.74 (d,  $J = 5.1$  Hz, 1H), 8.00 (d,  $J = 8.1$  Hz, 2H), 7.88 (dd,  $J = 8.0, 7.6$  Hz, 1H), 7.79 (d,  $J = 8.0$  Hz, 1H), 7.43 (d,  $J = 8.1$  Hz, 2H), 7.35 (dd,  $J = 7.6, 5.1$  Hz, 1H), 7.12 (dd,  $J = 8.7$  Hz,  $J_{\text{H-F}} = 5.5$  Hz, 2H), 7.05 – 7.00 (m, 4H), 6.93 (dd,  $J = 8.7$  Hz,  $J_{\text{H-F}} = 8.7$  Hz, 2H), 6.06 (dd,  $J = 7.6, 7.5$  Hz, 1H), 4.88 (dd,  $J = 6.6, 6.5$  Hz, 1H), 2.66 – 2.55 (m, 2H);  $^{13}\text{C NMR}$  (151 MHz,  $\text{CDCl}_3$ )  $\delta$  162.42 (d,  $J_{\text{C-F}} = 246.8$  Hz), 162.21 (d,  $J_{\text{C-F}} = 246.5$  Hz), 156.28, 148.28, 145.95, 142.69, 138.88, 138.56 (d,  $J_{\text{C-F}} = 3.3$  Hz), 136.78, 135.60 (d,  $J_{\text{C-F}} = 3.5$  Hz), 131.60 (d,  $J_{\text{C-F}} = 8.1$  Hz), 128.99 (d,  $J_{\text{C-F}} = 8.1$  Hz), 127.58, 126.73, 124.87, 122.82, 121.58, 115.51 (d,  $J_{\text{C-F}} = 21.4$  Hz), 115.21 (d,  $J_{\text{C-F}} = 21.4$  Hz), 74.05, 39.54;  $^{19}\text{F NMR}$  (564 MHz,  $\text{CDCl}_3$ )  $\delta$  -112.43, -112.87; HRMS  $m/z$  (FAB) calc. for  $\text{C}_{27}\text{H}_{22}\text{F}_2\text{NO}$   $[\text{M}+\text{H}]^+$  414.1669, found 414.1673;  $R_f$  0.43 (Hex/EtOAc, 1/1).



4,4-bis(4-chlorophenyl)-1-phenylbut-3-en-1-ol, **3ba**;  $^1\text{H NMR}$  (600 MHz,  $\text{CDCl}_3$ )  $\delta$  7.35 – 7.32 (m, 2H), 7.31 – 7.28 (m, 5H), 7.21 (d,  $J = 8.3$  Hz, 2H), 7.07 (d,  $J = 8.3$  Hz, 2H), 6.95 (d,  $J = 8.0$  Hz, 2H), 6.12 (dd,  $J = 7.5, 7.5$  Hz, 1H), 4.82 (dd,  $J = 6.4, 6.4$  Hz, 1H), 2.60 (ddd,  $J = 14.5, 7.5, 6.4$  Hz, 1H), 2.53 (dt,  $J = 14.5, 7.5, 6.4$  Hz, 1H);  $^{13}\text{C NMR}$  (151 MHz,  $\text{CDCl}_3$ )  $\delta$  143.76, 141.94, 140.45, 137.69, 133.20, 133.14, 131.13, 128.55, 128.50, 128.44, 128.30, 127.77, 125.91, 125.80, 74.21, 39.37; HRMS  $m/z$  (EI) calc. for  $\text{C}_{22}\text{H}_{17}\text{Cl}_2$   $[\text{M}-\text{H}_2\text{O}+\text{H}]^+$  351.0707, found 351.0692;  $R_f$  0.33 (Hex/EtOAc, 4/1).



1-phenyl-4,4-di-*p*-tolylbut-3-en-1-ol, **3ca**;  $^1\text{H NMR}$  (600 MHz,  $\text{CDCl}_3$ )  $\delta$  7.33 – 7.30 (m, 4H), 7.29 – 7.25 (m, 1H), 7.13 (d,  $J = 7.6$  Hz, 2H), 7.08 (d,  $J = 7.9$  Hz, 2H), 7.05 (d,  $J = 7.9$  Hz, 2H), 6.97 (d,  $J = 7.6$  Hz, 2H), 6.04 (dd,  $J = 7.4, 7.4$  Hz, 1H), 4.80 (dd,  $J = 6.5, 6.5$  Hz, 1H), 2.62 (ddd,  $J = 15.0, 7.4, 6.5$  Hz, 1H), 2.56 (ddd,  $J = 15.0, 7.4, 6.5$  Hz, 1H), 2.36 (s, 3H), 2.31 (s, 3H), 1.90 (bs, 1H);  $^{13}\text{C NMR}$  (151 MHz,  $\text{CDCl}_3$ )  $\delta$  144.46, 144.23, 140.07, 137.13, 137.03, 136.81, 129.92, 129.10, 128.98, 128.61, 127.76, 127.39, 126.12, 123.83, 74.66, 39.72, 22.87, 21.27; HRMS  $m/z$  (EI) calc. for  $\text{C}_{24}\text{H}_{23}$   $[\text{M}-\text{H}_2\text{O}+\text{H}]^+$  311.1800, found 311.1798;  $R_f$  0.38 (Hex/EtOAc, 4/1).



4,4-bis(4-methoxyphenyl)-1-phenylbut-3-en-1-ol, **3da**;  $^1\text{H NMR}$  (600 MHz,  $\text{CD}_3\text{CN}$ )  $\delta$  7.27 (dd,  $J = 7.0, 7.0$  Hz, 2H), 7.24 (d,  $J = 7.0$  Hz, 2H), 7.20 (t,  $J = 7.0$  Hz, 1H), 7.03 (d,  $J = 8.9$  Hz, 2H), 6.90 (d,  $J = 8.7$  Hz, 2H), 6.86 (d,  $J = 8.7$  Hz, 2H), 6.77 (d,  $J = 8.9$  Hz, 2H), 5.93 (dd,  $J = 7.4, 7.4$  Hz,

1H), 4.69 (dd,  $J = 6.5, 4.0$  Hz, 1H), 3.76 (s, 3H), 3.71 (s, 3H), 2.47 – 2.36 (m, 2H);  $^{13}\text{C}$  NMR (151 MHz,  $\text{CDCl}_3$ )  $\delta$  159.91, 159.69, 146.18, 143.29, 136.58, 133.34, 131.85, 129.15, 129.10, 128.01, 126.84, 124.70, 114.46, 114.45, 74.40, 55.88, 40.77 (one carbon signal is missing due to the overlap); HRMS  $m/z$  (EI) calc. for  $\text{C}_{24}\text{H}_{24}\text{O}_3$   $[\text{M}]^+$  360.1725, found 360.1727;  $R_f$  0.17 (Hex/EtOAc, 4/1).



4-(4-fluorophenyl)-1-phenyldec-3-en-1-ol, **3ea**;  $^1\text{H}$  NMR (600 MHz,  $\text{CDCl}_3$ )  $\delta$  7.38 (d,  $J = 7.5$  Hz, 2H), 7.34 (dd,  $J = 7.6, 7.5$  Hz, 2H), 7.29 – 7.26 (m, 1H), 7.22 (dd,  $J = 8.6, 5.6$  Hz, 2H), 6.97 – 6.93 (m, 2H), 5.58 (dd,  $J = 7.3, 7.3$  Hz, 1H), 4.79 (dd,  $J = 6.7, 6.7$  Hz, 1H), 2.69 (ddd,  $J = 15.1, 7.6, 6.7$  Hz, 1H), 2.65 – 2.57 (m, 1H), 2.41 – 2.38 (m, 2H), 1.23 – 1.16 (m, 8H), 0.83 (t,  $J = 7.1$  Hz, 3H);  $^{13}\text{C}$  NMR (151 MHz,  $\text{CDCl}_3$ )  $\delta$  162.07 (d,  $J_{\text{C-F}} = 245.0$  Hz), 144.38, 142.67, 139.25 (d,  $J_{\text{C-F}} = 3.3$  Hz), 128.63, 128.05 (d,  $J_{\text{C-F}} = 7.8$  Hz), 127.80, 126.04, 123.89, 115.10 (d,  $J_{\text{C-F}} = 21.1$  Hz), 74.45, 38.76, 31.82, 30.30, 29.39, 28.63, 22.76, 14.22; HRMS  $m/z$  (FAB) calc. for  $\text{C}_{22}\text{H}_{27}\text{FO}$   $[\text{M}]^+$  326.2046, found 326.2049;  $R_f$  0.38 (Hex/EtOAc, 4/1).



1,4-diphenyldec-3-en-1-ol, **3fa**;  $^1\text{H}$  NMR (600 MHz,  $\text{CDCl}_3$ )  $\delta$  7.41 (d,  $J = 7.4$  Hz, 2H), 7.37 (dd,  $J = 8.4, 6.7$  Hz, 2H), 7.32 – 7.28 (m, 6H), 5.66 (dd,  $J = 7.4, 7.4$  Hz, 1H), 4.81 (dd,  $J = 7.7, 5.5$  Hz, 1H), 2.72 (ddd,  $J = 15.2, 7.7, 7.4$  Hz, 1H), 2.67 – 2.62 (ddd,  $J = 15.2, 7.4, 5.5$  Hz, 1H), 2.47 – 2.44 (m, 2), 1.28 – 1.19 (m, 8H), 0.85 (t,  $J = 6.9$  Hz, 3H);  $^{13}\text{C}$  NMR (151 MHz,  $\text{CDCl}_3$ )  $\delta$  144.34, 143.91, 143.23, 128.66, 128.38, 127.81, 126.97, 126.60, 126.08, 123.76, 74.49, 38.85, 31.86, 30.23, 29.49, 28.80, 22.81, 14.26; HRMS  $m/z$  (FAB) calc. for  $\text{C}_{22}\text{H}_{27}$   $[\text{M}-\text{H}_2\text{O}+\text{H}]^+$  291.2113, found 291.2115;  $R_f$  0.44 (Hex/EtOAc, 4/1).



1-phenyl-4-(p-tolyl)dec-3-en-1-ol, **3ga**;  $^1\text{H}$  NMR (600 MHz,  $\text{CDCl}_3$ )  $\delta$  7.41 (d,  $J = 8.4$  Hz, 2H), 7.39 – 7.36 (m, 1H), 7.34 – 7.30 (m, 1H), 7.22 (d,  $J = 8.1$  Hz, 2H), 7.12 (d,  $J = 7.9$  Hz, 2H), 5.64 (dd,  $J = 7.5, 7.5$  Hz, 1H), 4.80 (dd,  $J = 7.7, 5.6$  Hz, 1H), 2.72 (ddd,  $J = 15.2, 7.7, 7.5$  Hz, 1H), 2.67 – 2.61 (ddd,  $J = 15.2, 7.5, 5.6$  Hz, 1H), 2.46 – 2.43 (m, 2H), 2.35 (s, 3H), 1.30 – 1.21 (m, 8H), 0.86 (t,  $J = 7.0$  Hz, 3H);  $^{13}\text{C}$  NMR (151 MHz,  $\text{CDCl}_3$ )  $\delta$  144.37, 143.73, 140.26, 136.63, 129.08, 128.63, 127.76, 126.44, 126.07, 122.97, 74.44, 38.87, 31.86, 30.18, 29.51, 28.82, 22.81, 21.23, 14.26; HRMS  $m/z$  (FAB) calc. for  $\text{C}_{23}\text{H}_{29}$   $[\text{M}-\text{H}_2\text{O}+\text{H}]^+$  305.2269, found 305.2272;  $R_f$  0.47 (Hex/EtOAc, 4/1).



4-(4-isopropylphenyl)-1-phenyldec-3-en-1-ol, **3ha**;  $^1\text{H}$  NMR (600 MHz,  $\text{CDCl}_3$ )  $\delta$  7.41 (d,  $J = 7.1$  Hz, 2H), 7.37 (dd,  $J = 7.3, 7.1$  Hz, 2H), 7.29 (t,  $J = 7.3$  Hz, 1H), 7.25 (d,  $J = 8.1$  Hz, 2H), 7.16 (d,  $J = 8.1$  Hz, 2H), 5.65

(dd,  $J = 7.4, 7.4$  Hz, 1H), 4.80 (dd,  $J = 7.7, 5.6$  Hz, 1H), 2.90 (p,  $J = 6.9$  Hz, 1H), 2.72 (ddd,  $J = 14.9, 7.7, 7.4$  Hz, 0H), 2.64 (ddd,  $J = 14.9, 7.4, 5.6$  Hz, 1H), 2.47 – 2.44 (m, 2H), 1.26 (d,  $J = 6.9$  Hz, 6H), 1.30 – 1.21 (m, 8H), 0.86 (t,  $J = 7.0$  Hz, 3H);  $^{13}\text{C}$  NMR (151 MHz,  $\text{CDCl}_3$ )  $\delta$  147.63, 144.36, 143.74, 140.55, 128.64, 127.76, 126.42, 126.40, 126.08, 122.97, 74.48, 38.90, 33.90, 31.87, 30.21, 29.57, 28.93, 24.18, 22.83, 14.27; HRMS  $m/z$  (FAB) calc. for  $\text{C}_{25}\text{H}_{33}$   $[\text{M}-\text{H}_2\text{O}+\text{H}]^+$  333.2582, found 333.2579;  $R_f$  0.47 (Hex/EtOAc, 4/1).

## References

- [S1] Z. Zhao, L. Racicot and G. K. Murphy, Fluorinative Rearrangements of Substituted Phenylallenes Mediated by (Difluoroiodo)toluene: Synthesis of alpha-(Difluoromethyl)styrenes, *Angew. Chem. Int. Ed.*, 2017, **56**, 11620-11623.
- [S2] H. Clavier, K. Le Jeune, I. de Riggi, A. Tenaglia and G. Buono, Highly selective cobalt-mediated [6 + 2] cycloaddition of cycloheptatriene and allenes, *Org. Lett.*, 2011, **13**, 308-311.
- [S3] A. Kopfer and B. Breit, Rhodium-Catalyzed Hydroformylation of 1,1-Disubstituted Allenes Employing the Self-Assembling 6-DPPon System, *Angew. Chem. Int. Ed.*, 2015, **54**, 6913-6917.

# NMR Spectra (<sup>1</sup>H NMR, <sup>13</sup>C NMR and <sup>19</sup>F NMR)





































**3ai**;  $^{19}\text{F}$  NMR  
(564 MHz,  $\text{CDCl}_3$ )
